# Supplementary material for: Release of infectious virus and cytokines in nasopharyngeal swabs from individuals infected with non-B.1.1.7 or B.1.1.7 SARS-CoV-2 variants
Source: bioRxiv or medRxiv preprint supplement (doi:10.1101/2021.05.20.21257393), 2021-05-22
Supplement: Supplementary file [file media-1.pdf]

| <b>Cohort #1</b>                      |               |             |
|---------------------------------------|---------------|-------------|
| Number of samples                     |               | 200         |
| Age (years), median (IQR)             |               | 47 (29, 67) |
| Sex                                   |               |             |
|                                       | Female        | 114         |
|                                       | Male          | 83          |
|                                       | ND            | 3           |
| Clinical                              |               |             |
|                                       | Asymptomatics | 18          |
|                                       | Mild symptoms | 114         |
|                                       | Hospitalized  | 34          |
|                                       | ICU           | 11          |
|                                       | ND            | 23          |
| Number of samples with known days POS |               | 149         |
| Days POS, median (IQR)                |               | 3 (1, 6)    |

| <b>Cohort #2</b>                      | <b>Non-B.1.1.7</b> | <b>B.1.1.7</b> |
|---------------------------------------|--------------------|----------------|
| Number of samples                     | 70                 | 157            |
| Age (years), median (IQR)             | 66 (48, 85)        | 55 (40,74)     |
| Sex                                   |                    |                |
|                                       | Female             | 42             |
|                                       | Male               | 28             |
| Clinical                              |                    |                |
|                                       | Asymptomatics      | 5              |
|                                       | Mild symptoms      | 21             |
|                                       | Hospitalized       | 19             |
|                                       | ICU                | 11             |
|                                       | ND                 | 14             |
| Number of samples with known days POS | 43                 | 108            |
| Days POS, median (IQR)                | 3 (1,8)            | 3 (1.8, 7)     |

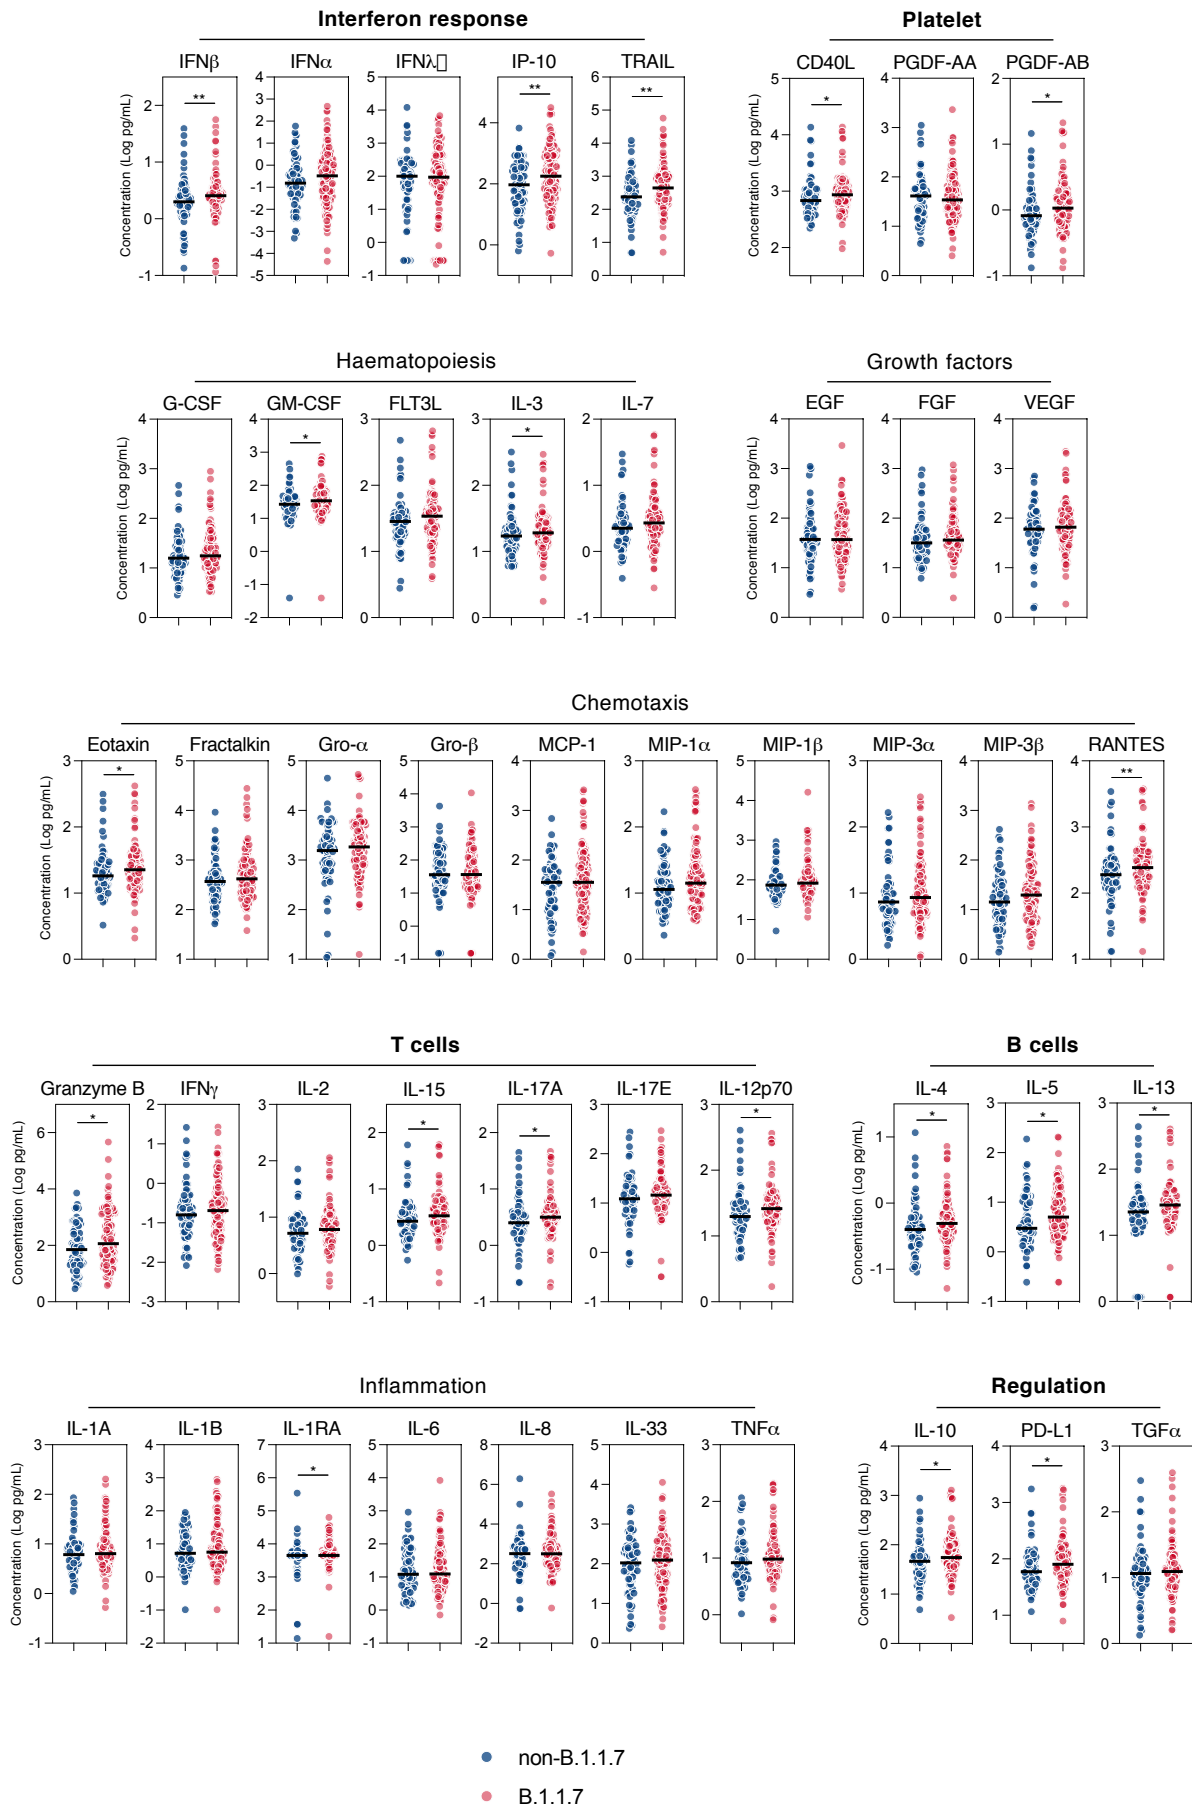

Figure S1

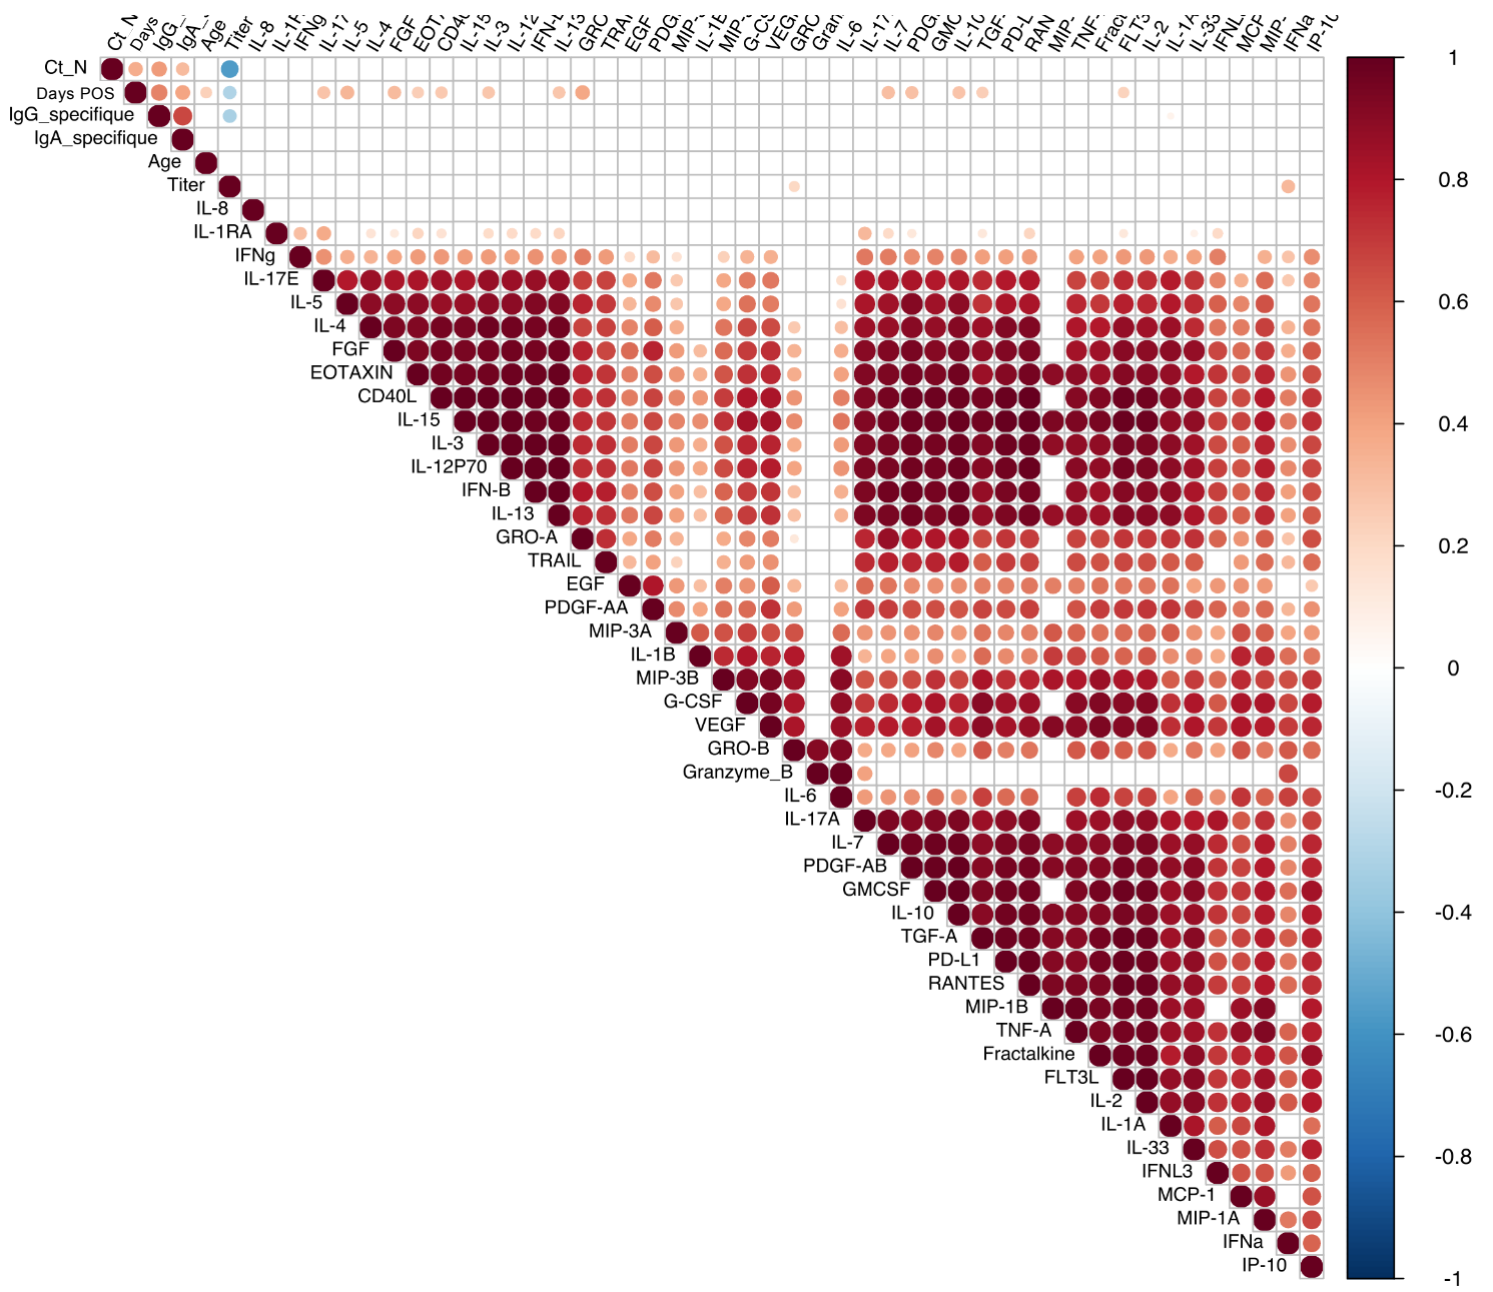

Figure S2
